# Supplementary material for: Evaluation of the NMP22 BladderChek test for detecting bladder cancer: a systematic review and meta-analysis
Source: PubMed Central journal article supplement (PMC5725051; doi:10.18632/oncotarget.22065), 2017-10-23
Supplement: oncotarget-08-100648-s001.pdf [file oncotarget-08-100648-s001.pdf]

# Evaluation of the NMP22 BladderChek test for detecting bladder cancer: a systematic review and meta-analysis

## SUPPLEMENTARY MATERIALS

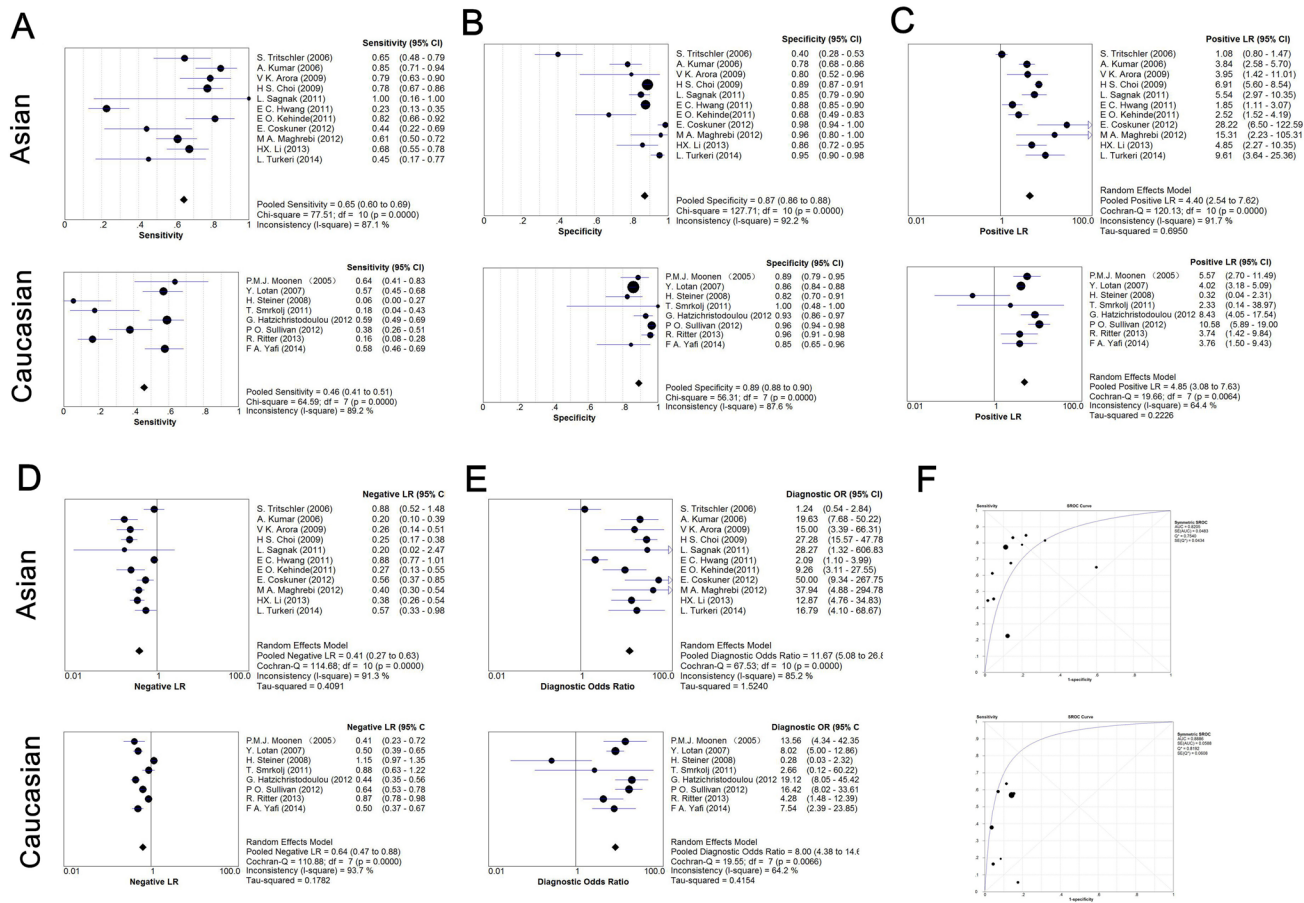

Supplementary Figure 1: Meta-analysis of pooled sensitivity (A), specificity (B), PLR (C), NLR (D), DOR (E), and ROC (F) in Asian and Caucasian populations.

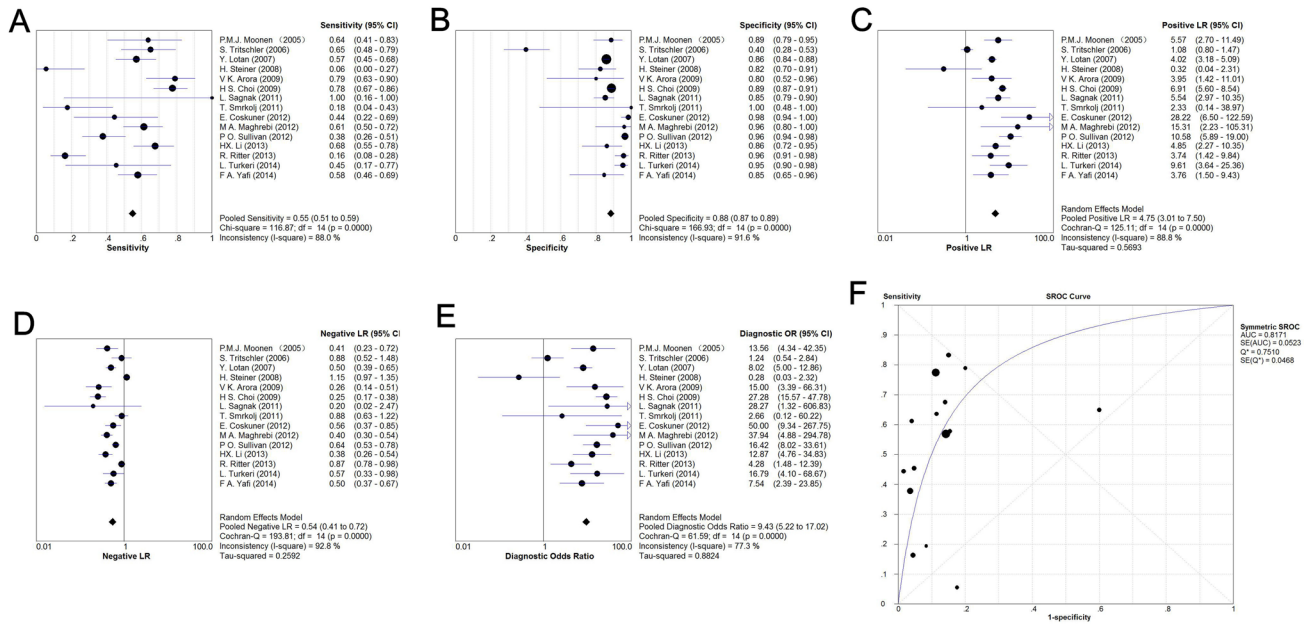

**Supplementary Figure 2:** Meta-analysis of pooled sensitivity (A), specificity (B), PLR (C), NLR (D), DOR (E), and ROC (F) among studies on primary tumor detection.

**Supplementary Table 1:** Systematic review of eligible trials in our study. See Supplementary\_Table\_1.
